# Supplementary material for: Functionalized mesoporous silica nanoparticles as a catalyst to synthesize a luminescent polymer/silica nanocomposite
Source: Royal Society of Chemistry journal article supplement (doi:10.1039/c5ra25135d), 2016-01-01
Supplement: c5ra25135d1.pdf [file c5ra25135d1.pdf]

[Electronic Supplementary Information]

**Functionalized Mesoporous Silica Nanoparticle as Catalyst to Synthesize Luminescent Polymer/silica Nanocomposite**

Duihai Tang,<sup>a</sup> Wenting Zhang,<sup>a</sup> Zhenan Qiao,<sup>b</sup> Yunling Liu,<sup>b</sup> and Qisheng Huo<sup>b\*</sup>

<sup>a</sup> Institute of Catalysis for Energy and Environment, Shenyang Normal University, Shenyang 110034, China

<sup>b</sup> State Key Laboratory of Inorganic Synthesis and Preparative Chemistry, College of Chemistry, Jilin University, Changchun 130012, China

**\* To whom correspondence should be addressed.**

Qisheng Huo

Tel: (+86)-431-85168602;

Fax: (+86)-431-85168602;

E-mail: huoqisheng@jlu.edu.cn

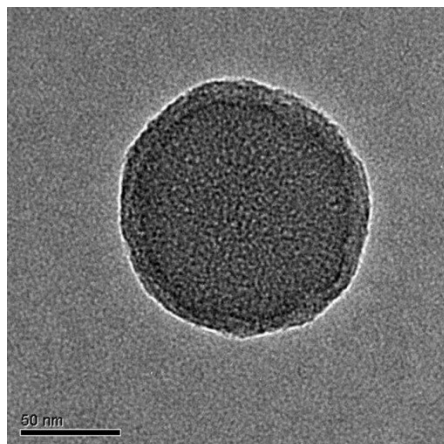

Fig. S1. TEM image of MSN.

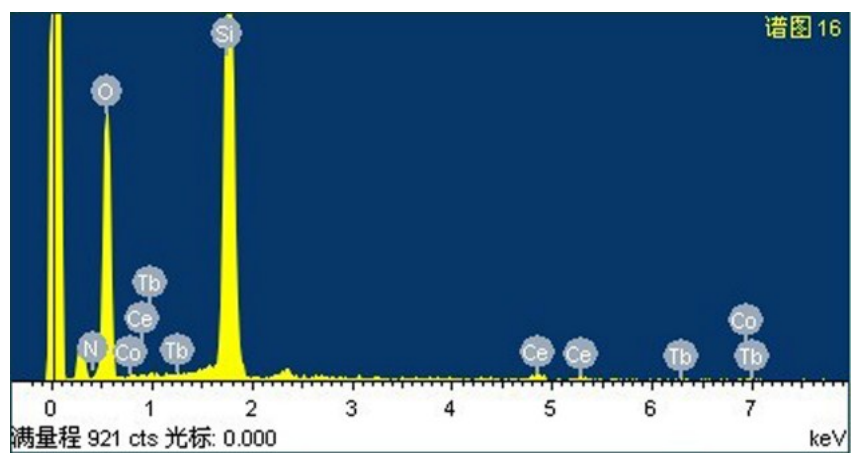

Fig. S2. EDX of CTMCo.

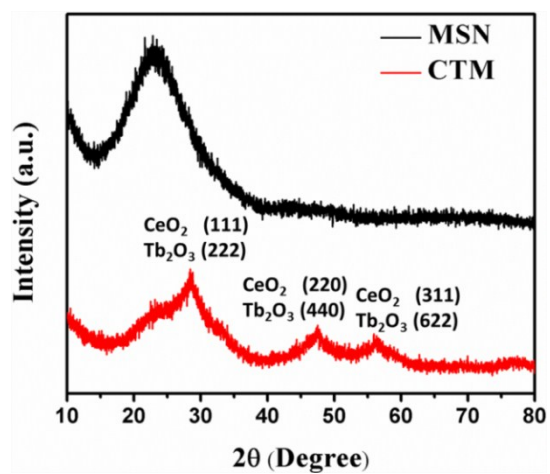

Fig. S3. XRD patterns of MSN (black) and CTM (red).

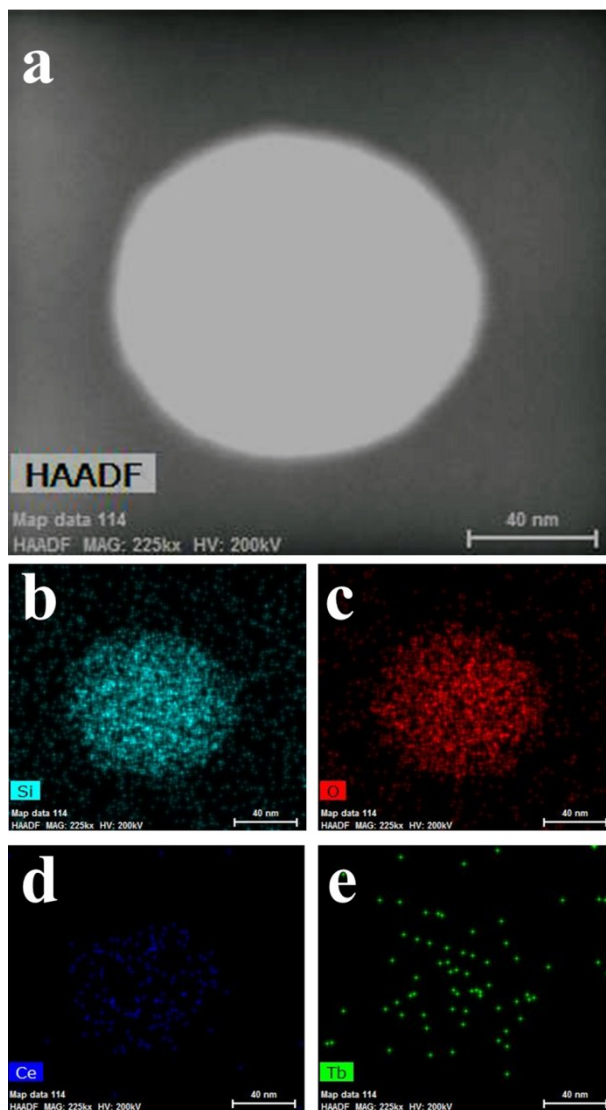

**Fig. S4.** (a) TEM image of CTM with corresponding EDS elemental mappings of (b) Si, (c) O, (d) Ce and (e) Tb for CTM.

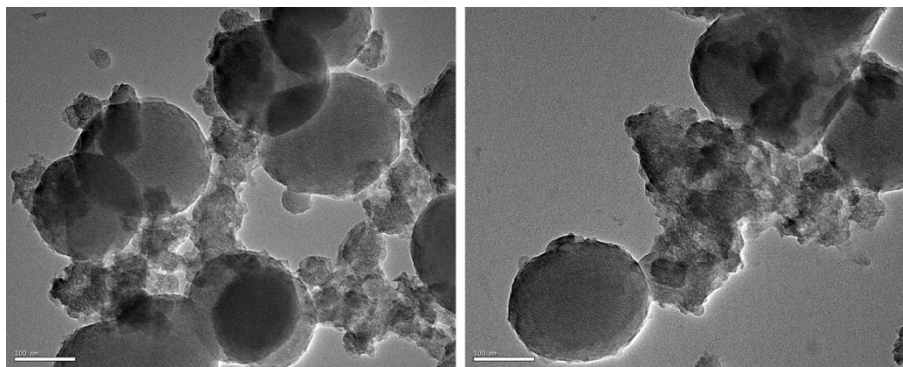

**Fig. S5.** TEM images of PE/CTMCo (the scale bars are both 100 nm).

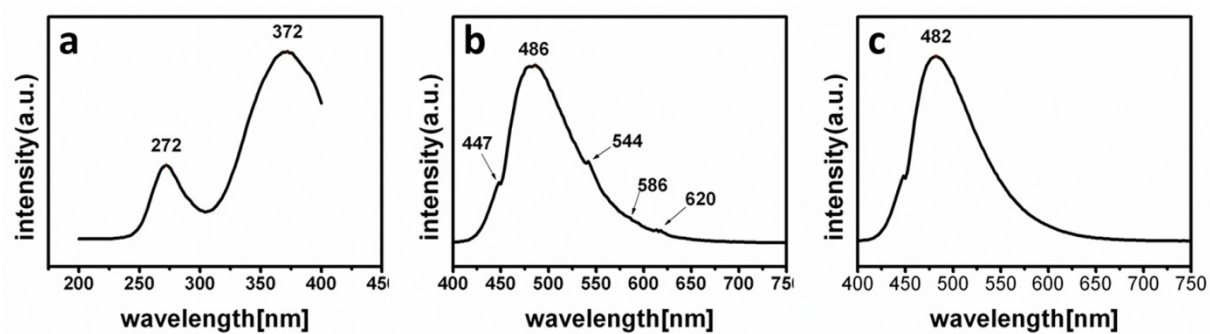

**Fig. S6.** Excitation (a) and emission spectra for PE/CTMCo with  $\lambda_{ex} = 272$  nm (b) and PE/CTMCo with  $\lambda_{ex} = 372$  nm (c).
